# Supplementary material for: Newly discovered and conserved role of IgM against viral infection in an early vertebrate
Source: eLife journal article supplement (doi:10.7554/elife.104465), 2025-02-17
Supplement: fig3-figsupp1-data1 [file elife-104465-fig3-figsupp1-data1-v1.pdf]

**Figure 3–figure supplement 1A**

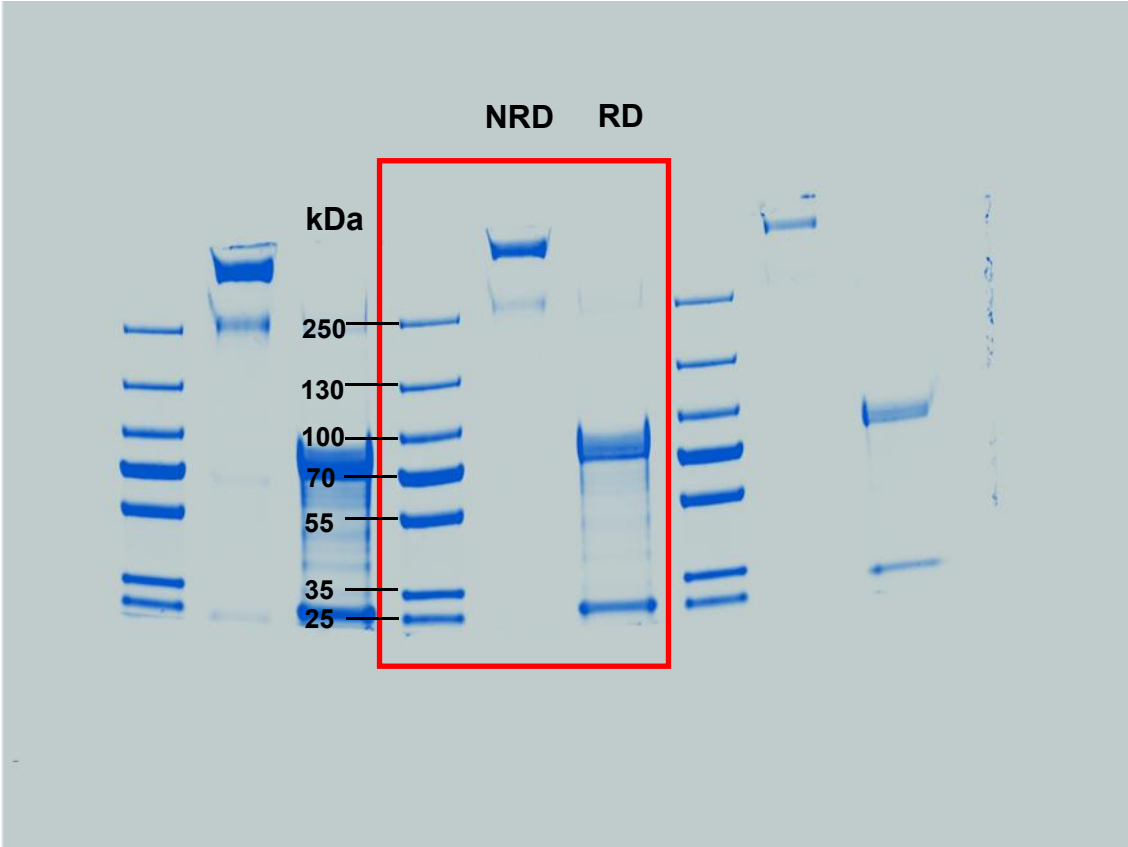

**Figure 3–figure supplement 1** Original membranes corresponding to Figure 3–figure supplement 1A. Molecular weight markers were employed. The areas highlighted by red boxes are used in this result figure.
