# Supplementary material for: Newly discovered and conserved role of IgM against viral infection in an early vertebrate
Source: eLife journal article supplement (doi:10.7554/elife.104465), 2025-02-17
Supplement: fig6-figsupp2-data1 [file elife-104465-fig6-figsupp2-data1-v1.pdf]

Figure 6–figure supplement 2C

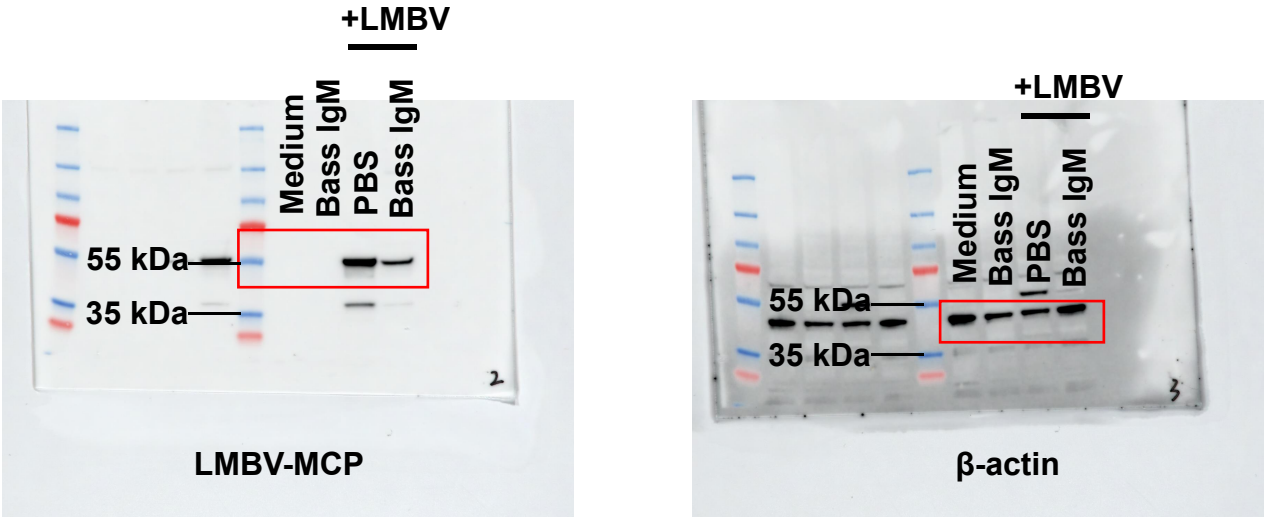

Figure 6–figure supplement 2E

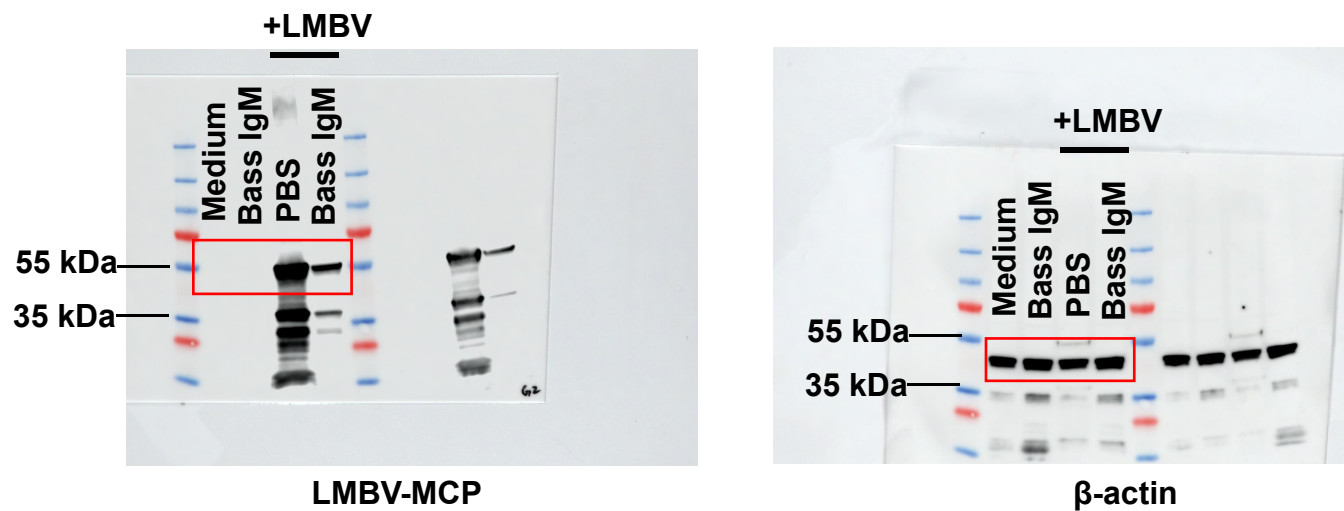

**Figure 6–figure supplement 2** Original membranes corresponding to Figure 6–figure supplement 2C and 2E. The left membranes correspond to LMBV-MCP, and the right membranes correspond to β-actin. Rainbow molecular weight markers were employed. The areas highlighted by red boxes are used in this result figure.
